# Supplementary material for: Health-Related Quality of Life, Functional Decline, and Long-Term Mortality in Older Patients Following Hospitalisation Due to COVID-19
Source: Research Square preprint supplement (doi:10.21203/rs.3.rs-150067/v1), 2021-02-01
Supplement: Supplementary file 1 [file c3343ca1fa9f67005835040d.docx]

**Supplementary appendix**

**Health-related quality of life, functional decline, and long-term mortality in older patients following hospitalisation due to COVID-19**

Walle-Hansen MM1, Ranhoff AH2, 3, Mellingsæter M4, Wang-Hansen M5, Myrstad M1, 6

**1** Department of Medical Research, Bærum Hospital Vestre Viken Hospital Trust, N-1346 Gjettum, Norway. Corresponding author: mail: marte@hansencorp.eu

2 Department of Medicine, Diakonhjemmet Hospital, Oslo, Norway

3 Department of Clinical Science, University of Bergen, Bergen, Norway

4 Department of Geriatric Medicine, Akershus University Hospital, Lørenskog, Norway

5 Department of Geriatric Medicine, Vestfold Hospital Trust, Tønsberg, Norway

6 Department of Internal Medicine, Bærum Hospital Vestre Viken Hospital Trust, N-1346 Gjettum, Norway

**Table of contents**

Symptom Questionnaire …………………………………………………………………………………………………….. 2

**Symptom Questionnaire**

1. Has your cognitive function changed?

- Yes, I have experienced a change in cognition
- No, I have not experienced a change in cognition
